# Supplementary material for: A New High-Throughput Approach to Genotype Ancient Human Gastrointestinal Parasites
Source: PubMed Central journal article supplement (PMC4709038; doi:10.1371/journal.pone.0146230), 2016-01-11
Supplement: pone.0146230.s008.pdf [file pone.0146230.s008.pdf]

**Supplementary data for:**

**A new high-throughput approach to genotype ancient human gastrointestinal parasites**

Nathalie M. L. Côté, Julien Daligault, Mélanie Pruvost, E. Andrew Bennett, Olivier Gorgé, Silvia Guimaraes, , Nicolas Capelli, Matthieu Le Bailly, Eva-Maria Geigl\*, Thierry Grange\*

**About the Authors**

N. M. L. Côté, J. Daligault, M. Pruvost, O. Gorgé, S. Guimaraes, E. A. Bennett E.-M. Geigl, T. Grange

Institut Jacques Monod, CNRS, University Paris Diderot, UMR 7592, Epigenome and Paleogenome group, 15 rue Hélène Brion, 75205 Paris cedex 13, France.

N. M. L. Côté, M. Le Bailly, N. Capelli

University of Bourgogne Franche-Comte, CNRS UMR 6249 Chrono-environment, 16 route de Gray, 25030, Besançon cedex, France.

\*equal contribution

**Corresponding Authors**

[eva-maria.geigl@ijm.fr](mailto:eva-maria.geigl@ijm.fr); [thierry.grange@ijm.fr](mailto:thierry.grange@ijm.fr)

| Primer name | Organism Gene                                                                | Size of amplicon (bp) | Primer sequences                                                                |
|-------------|------------------------------------------------------------------------------|-----------------------|---------------------------------------------------------------------------------|
| Tae23       | <i>Taenia</i><br>Cytochrome oxidase 1 (cox1)                                 | 73                    | U : GAG GTT TTA GGT TCW TAT GGT T<br>L : CAT TAT GAG AAG CYA CAG GAC T          |
| Tae32       | <i>Taenia</i><br>Cytochrome b (cytb)                                         | 113                   | U : ATA TGG CTC GTG CTT TGT ATT ATT C<br>L: AGG TAA TAT ATA TCC WGT AAA AGC CTC |
| Echino5     | <i>Echinococcus</i><br>Phosphoenolpyruvate<br>carboxykinase (pepck, nuclear) | 109                   | U : CAC ATG TTG CTG AAG GCG TTA<br>L : AAT GTA CGG TCG TTC ATG CAG              |
| Echino23    | <i>Echinococcus</i><br>cox1                                                  | 99                    | U: TTT TGA TCC GTT AGG TGG T<br>L: CCA AAT CCA GGC ARA ATC                      |
| Diphyllo2   | <i>Diphyllobothrium</i><br>cox1                                              | 52                    | U: GTT GTG TGG GGG CAT CAT A<br>L:CAG CCG TCT TTA CAT CTA AAC C                 |
| Diphyllo23  | <i>Diphyllobothrium</i><br>cox1                                              | 67                    | U: TTT AYG GGT TGT TAT TTG CT<br>L: ATA TGA TGC CCC CAC ACA                     |
| Asc2        | <i>Ascaris</i><br>cytb                                                       | 74                    | U: GCC AAA GCA CCA TCA TTA GAA TA<br>L : GGT ATG GTT TTG GGT TTT CAG A          |
| Asc4        | <i>Ascaris</i><br>NADH dehydrogenase 1 (nad1)                                | 104                   | U : GCG TAT TGG YCC TAA TAA GGT TAG T<br>L :CCG AAG AAT TCA RAG GAG TCA         |
| Trich3      | <i>Trichuris trichiura</i><br>Large ribosomal subunit (LSU)                  | 74                    | U :TCA TCC AAA TGA TTG ATT ATG ACC T<br>L :CGA AAA TAA AGT TCT TCT GCA AAC TA   |
| Trich4      | <i>Trichuris trichiura</i><br>LSU                                            | 91                    | U: TCG ATG TTG AAT CAT TTG TAT ATA TAG T<br>L:GGT TTA AAC TCA AAT CAC GTA ATG T |
| Dicro22     | <i>Dicrocoelium</i><br>Internal transcribed spacer 2<br>(nuclear)            | 76                    | U : TAC ACA CAC CTA GTT ATC AGA CAG<br>L: ACA GAC CGC GCA TAA ATA               |
| Dicro6.1    | <i>Dicrocoelium</i><br>nad1                                                  | 77                    | U: TAA GTA TAA GTT TST GGT TTC TCA GTT TC<br>L: AAG CWA CCA AAA TCA TCA AAA ACA |
| Fas2        | <i>Fasciola</i><br>cox1                                                      | 69                    | U : GTT GAT TGG GGG KTT TGG TA<br>L : CGA GGC AAA TTC AAA TCA GG                |
| Fas3        | <i>Fasciola</i><br>rRNA18s (nuclear)                                         | 85                    | U : AAC CTG CGG AAG GAT CAT TA<br>L: GCA AAT TTT TAT CGC ATG ACA                |
| Entero2     | <i>Enterobius vermicularis</i><br>SL1RNA (nuclear)                           | 56                    | U: TTT ATT TCC AAG CCA CAG ACT CA<br>L: AAT TTC TCG TTC CGG CTC AG              |
| Entero4     | <i>Enterobius vermicularis</i><br>cox1                                       | 53                    | U: CTG TGC CRA CTG GGG TAA AG<br>L : TCC CCC TAT CAA AGT CAA CAA C              |

**S1 Table. Optimal primer pairs targeting gastrointestinal helminths.**

Côté et al, Genotyping of ancient parasites, Supplementary data

| Genus                    | species                       | PCR product 1                                                                            | PCR product 2                                                                                                                                             |
|--------------------------|-------------------------------|------------------------------------------------------------------------------------------|-----------------------------------------------------------------------------------------------------------------------------------------------------------|
| <i>Taenia</i>            | <i>solium</i>                 | <b>Tae23</b><br>CATCTAGCTGTTTGGTGAATTTTTTATG<br>T.....G.....                             | <b>Tae32</b><br>AAGTTATAGAAAGAAGGGTGTGTGAAATGTTGGGTTTATTTTATATTTATTGGTTATGGGAG<br>.....C.....<br>.....A.....G.....                                        |
|                          | <i>saginata</i>               | .G....T...AT..RG.....<br>.G.A...T...AT...G.....                                          | .....A.....A.....A.....G...G.....A.....T..                                                                                                                |
|                          | <i>asiatica</i>               | .....T...AT...G.....                                                                     | .....A.....A.....A.....G...G.....A.....T..                                                                                                                |
| <i>Echino-coccus</i>     | <i>granulosus</i>             | <b>Echino5</b><br>AAGGCATCCTTGCCCAATGGATCTCGCCAAAAGATCTTGACGAATCCCTTAGGGATCGCTTCCCTGG    | <b>Echino23</b><br>GGTGATCCTATTTTGTTC AACATATGTTTGGTTTTTGGCCATCC TGAGGTTTATGTGTT<br>.....A.....H.....<br>.....A.....Y.....T...T.....<br>.....A.....C..... |
|                          | <i>multilo-cularis</i>        | .....                                                                                    | .....Y.A.....T...G.....T..<br>.....R.....T...G.....G..                                                                                                    |
| <i>Diphyllo-bothrium</i> | <i>latum</i>                  | <b>Diphyllo2</b><br>TGTTTACGGTG                                                          | <b>Diphyllo23</b><br>ATGTTTCTATAGTTTGTAGGTAGAGT                                                                                                           |
|                          | <i>dendri-ticum</i>           | .....A..A                                                                                | ....Y.....C..C..G....T..                                                                                                                                  |
|                          | <i>nihon-kaiense</i>          | .....A...                                                                                | .....C.....T..                                                                                                                                            |
| <i>Ascaris</i>           | <i>lumbri-coides and suum</i> | <b>Asc2</b><br>TTTTGACTGGTACTTTTTTGGCTTTTTAT<br>.....GT.....R.....<br>.....AC.....G..... | <b>Asc4</b><br>TTTATAGGTTTTTGCAGGCCATTTTTGATGGTGTTAAACTTTTAAAGAARGAGCAGA<br>.....Y.....T.....A..G.....                                                    |
| <i>Trichuris</i>         | <i>trichiura</i>              | <b>Trich3</b><br>CGATGTTGAATCATTGTATATA                                                  | <b>Trich4</b><br>TTGCAGAAGAACTTTATTTTCGTCTGTTTCGACGATGGA                                                                                                  |
| <i>Dicro-coelium</i>     | <i>dendri-ticum</i>           | <b>Dicro22</b><br>GTGGAGATGTGTCTACGGAGTCGTGGCT                                           | <b>Dicro6.1</b><br>GGGATTGGTTGTCTTGGTTGGTT                                                                                                                |
|                          | <i>chinensis</i>              | .....                                                                                    | .....A.....                                                                                                                                               |

|                   |                     |                                                                                    |                                                                      |
|-------------------|---------------------|------------------------------------------------------------------------------------|----------------------------------------------------------------------|
| <i>Fasciola</i>   | <i>hepatica</i>     | <b>Fas2</b><br>ATTATTTGTTGCC <b>YT</b> TATTGTTAGG <b>T</b> ATT<br>.....CY.....G... | <b>Fas3</b><br>CCTGAAAATCTACTCT <b>C</b> ACACAAGCGATACACGTGTGACCGTCA |
|                   | <i>gigantica</i>    | .Y.....A.....T..GC.T..G.....<br>.....T..GC.T..G.....<br>.....A..A..T..GC.T.....    | ..... <b>T</b> .....                                                 |
| <i>Enterobius</i> | <i>vermicularis</i> | <b>Entero2</b><br>CTGATGTTTCATGT                                                   | <b>Entero4</b><br>GTTTTTAGTTG                                        |

**S2 Table. Sequences of the insert of the PCR products showing the variability found in published sequences within and between species.** When several related sequences were available, only the positions differing with the reference sequence are indicated, whereas identical positions are represented by dots. The IUPAC nucleotide ambiguity code was used.

| Multiplex 1<br>4 mM MgCl <sub>2</sub> |            | Multiplex 2<br>5 mM MgCl <sub>2</sub> |            | Multiplex 3<br>4mM MgCl <sub>2</sub> |            | Multiplex 4<br>5 mM MgCl <sub>2</sub> |            |
|---------------------------------------|------------|---------------------------------------|------------|--------------------------------------|------------|---------------------------------------|------------|
| primers                               | [ $\mu$ M] | primers                               | [ $\mu$ M] | primers                              | [ $\mu$ M] | primers                               | [ $\mu$ M] |
| Tae32                                 | 0.15       | Tae23                                 | 0.2        | Trich3                               | 0.25       | Dicro6.1                              | 0.2        |
| Echino5                               | 0.08       | Trich4                                | 0.08       | Entero4                              | 0.08       | Asc4                                  | 0.2        |
| Diphyllo2                             | 0.08       | Dicro22                               | 0.08       |                                      |            | Fas3                                  | 0.08       |
|                                       |            | Entero2                               | 0.08       |                                      |            | Fas2                                  | 0.08       |
|                                       |            | Diphyllo23                            | 0.08       |                                      |            | Echino23                              | 0.08       |
|                                       |            |                                       |            |                                      |            | Asc2                                  | 0.08       |

**S3 Table. Experimental conditions for the various multiplex PCRs.** Optimal MgCl<sub>2</sub>, and primer concentrations used for each individual multiplex PCR are shown.

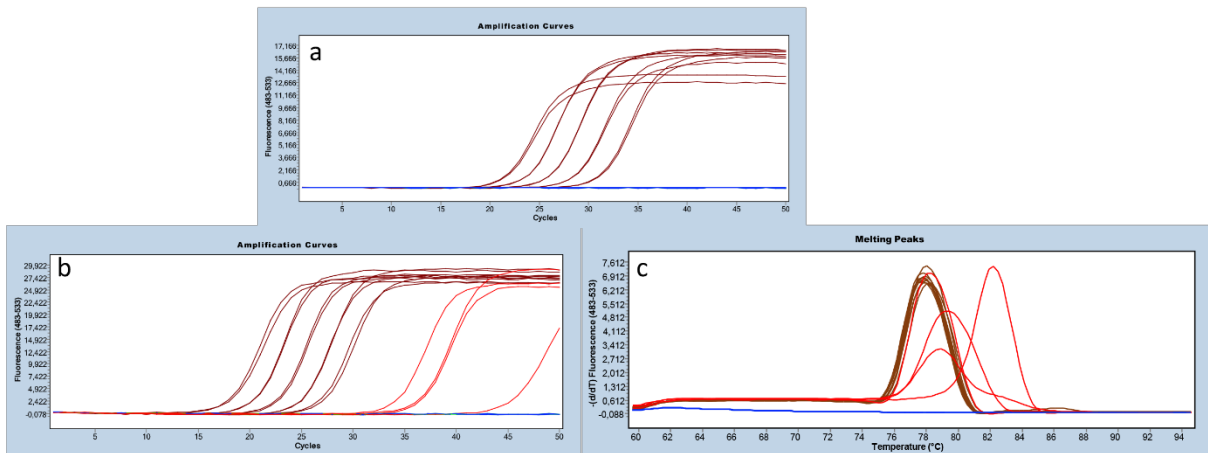

**S1 Fig. Examples of simplex PCR with primer pairs giving rise (b,c) or not (a) to primer dimers.** Standard curves performed in duplicates with serial 5-fold dilution of reference DNA are colored in brown, whereas the no template controls (NTC) are represented in red when they give rise to amplification products, and in blue when they do not. a-b) amplification phase of the qPCR, c) melting curve phase of the experiment displayed in panel b. In this latter experiment, four of the six NTCs which give rise to primer dimers have various distinct melting temperatures (T<sub>m</sub>). The T<sub>m</sub> of the dimer is usually different from that of the product, but it happens sometimes that these values are similar, as shown here for one of the dimers. In such cases, only electrophoretic analyses can distinguish between dimers and PCR products. Three of these dimers were generated at a Ct between 33 and 36, which is similar to the cycles of the PCR where products corresponding to rare initial molecules typical of ancient samples are also detected. A primer pair with such properties is thus not recommended for the detection of ancient DNA molecules. Results obtained with an optimal primer pair have been displayed in panel a) for comparison.

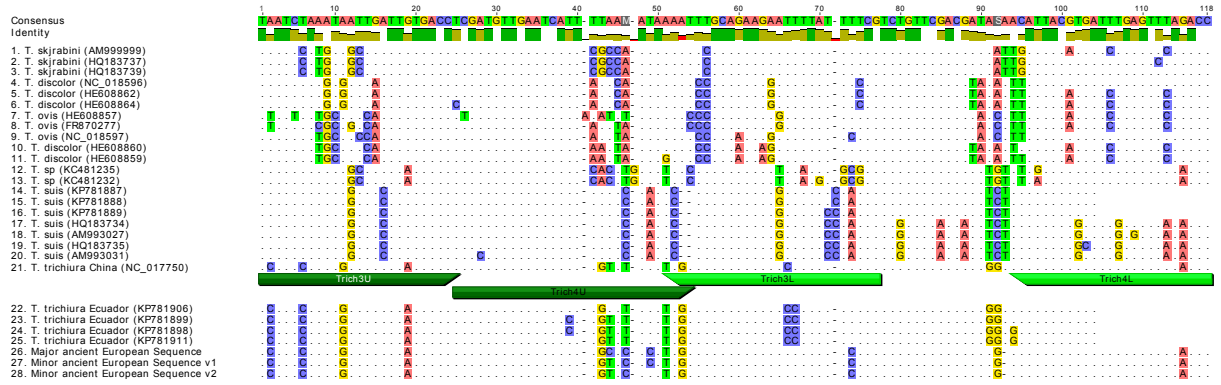

**S2 Fig. Comparison of the ancient and modern genetic diversity of *Trichuris* species as revealed through the combination of the overlapping Trich3 and Trich4 PCR fragments.** The divergence of the primers from sequences of animal species can be seen. Most mismatches between the primers and modern and ancient sequences correspond to G-T mismatch, which are the least destabilizing mismatches (e.g., [1]).

1. Pan S, Sun X, Lee JK (2006) DNA stability in the gas versus solution phases: a systematic study of thirty-one duplexes with varying length, sequence, and charge level. *J Am Soc Mass Spectrom* 17: 1383-1395.



NNNNNNNNNNNNNNNNNNNNNNNNNNNNNNNNNNNNNNNNNNNNNNNNNNNNNNNNNNNN

## 3. gff file for mapping and downstream analyses

**S3 File. ref\_parasites.gff**

##gff-version 3

##source-version geneious 6.1.8

|                       |                     |      |      |   |   |   |                               |
|-----------------------|---------------------|------|------|---|---|---|-------------------------------|
| ref_parasitesGeneious | misc_feature        | 85   | 89   | . | . | . | gene_id "Taenia23";           |
| ref_parasitesGeneious | misc_feature        | 229  | 232  | . | . | . | gene_id "Taenia32";           |
| ref_parasitesGeneious | misc_feature        | 385  | 395  | . | . | . | gene_id "Echinococcus5";      |
| ref_parasitesGeneious | misc_feature        | 538  | 546  | . | . | . | gene_id "Echinococcus23";     |
| ref_parasitesGeneious | misc_feature        | 668  | 672  | . | . | . | gene_id "Diphyllobothrium2";  |
| ref_parasitesGeneious | misc_feature        | 782  | 784  | . | . | . | gene_id "Diphyllobothrium23"; |
| ref_parasitesGeneious | misc_feature        | 898  | 902  | . | . | . | gene_id "Ascaris2";           |
| ref_parasitesGeneious | misc_feature        | 1036 | 1044 | . | . | . | gene_id "Ascaris4";           |
| ref_parasitesGeneious | misc_feature        | 1185 | 1187 | . | . | . | gene_id "Trichuris3";         |
| ref_parasitesGeneious | misc_feature        | 1320 | 1328 | . | . | . | gene_id "Trichuris4";         |
| ref_parasitesGeneious | misc_feature        | 1450 | 1452 | . | . | . | gene_id "Dicrocoelium22";     |
| ref_parasitesGeneious | misc_feature        | 1571 | 185  | . | . | . | gene_id "Dicrocoelium61";     |
| ref_parasitesGeneious | misc_feature        | 1684 | 1704 | . | . | . | gene_id "Fasciola2";          |
| ref_parasitesGeneious | misc_feature        | 1809 | 1813 | . | . | . | gene_id "Fasciola3";          |
| ref_parasitesGeneious | misc_feature        | 1937 | 1938 | . | . | . | gene_id "Enterobius2";        |
| ref_parasitesGeneious | misc_feature        | 2044 | 2047 | . | . | . | gene_id "Enterobius4"         |
| ref_parasitesGeneious | primer_bind         | 51   | 72   | . | + | . | gene_id "Tae23U";             |
| ref_parasitesGeneious | primer_bind         | 174  | 198  | . | + | . | gene_id "Tae32U";             |
| ref_parasitesGeneious | primer_bind         | 337  | 357  | . | + | . | gene_id "Echino5U";           |
| ref_parasitesGeneious | primer_bind         | 496  | 514  | . | + | . | gene_id "Echino23U";          |
| ref_parasitesGeneious | primer_bind         | 645  | 663  | . | + | . | gene_id "Diphyllo2U";         |
| ref_parasitesGeneious | primer_bind         | 747  | 766  | . | + | . | gene_id "Diphyllo23U";        |
| ref_parasitesGeneious | primer_bind         | 864  | 236  | . | + | . | gene_id "Asc2U";              |
| ref_parasitesGeneious | primer_bind         | 988  | 1012 | . | + | . | gene_id "Asc4U";              |
| ref_parasitesGeneious | primer_bind         | 1142 | 1166 | . | + | . | gene_id "Trich3U";            |
| ref_parasitesGeneious | primer_bind         | 1266 | 1292 | . | + | . | gene_id "Trich4U";            |
| ref_parasitesGeneious | primer_bind         | 1407 | 1430 | . | + | . | gene_id "Dicro22U";           |
| ref_parasitesGeneious | primer_bind         | 1533 | 1561 | . | + | . | gene_id "Dicro61U";           |
| ref_parasitesGeneious | primer_bind         | 1660 | 1679 | . | + | . | gene_id "Fas2U";              |
| ref_parasitesGeneious | primer_bind         | 1779 | 1798 | . | + | . | gene_id "Fas3U";              |
| ref_parasitesGeneious | primer_bind         | 1914 | 1936 | . | + | . | gene_id "Entero2U";           |
| ref_parasitesGeneious | primer_bind         | 2020 | 2039 | . | + | . | gene_id "Entero4U";           |
| ref_parasitesGeneious | primer_bind_reverse | 102  | 123  | . | - | . | gene_id "Tae23L";             |
| ref_parasitesGeneious | primer_bind_reverse | 261  | 286  | . | - | . | gene_id "Tae32L";             |
| ref_parasitesGeneious | primer_bind_reverse | 425  | 445  | . | - | . | gene_id "Echino5L";           |
| ref_parasitesGeneious | primer_bind_reverse | 577  | 594  | . | - | . | gene_id "Echino23L";          |
| ref_parasitesGeneious | primer_bind_reverse | 675  | 696  | . | - | . | gene_id "Diphyllo2L";         |
| ref_parasitesGeneious | primer_bind_reverse | 796  | 813  | . | - | . | gene_id "Diphyllo23L";        |
| ref_parasitesGeneious | primer_bind_reverse | 915  | 937  | . | - | . | gene_id "Asc2L";              |
| ref_parasitesGeneious | primer_bind_reverse | 1071 | 1091 | . | - | . | gene_id "Asc4L";              |
| ref_parasitesGeneious | primer_bind_reverse | 1190 | 1215 | . | - | . | gene_id "Trich3L";            |
| ref_parasitesGeneious | primer_bind_reverse | 1332 | 1356 | . | - | . | gene_id "Trich4L";            |
| ref_parasitesGeneious | primer_bind_reverse | 1459 | 1482 | . | - | . | gene_id "Dicro22L";           |
| ref_parasitesGeneious | primer_bind_reverse | 1586 | 1609 | . | - | . | gene_id "Dicro61L";           |
| ref_parasitesGeneious | primer_bind_reverse | 1709 | 1728 | . | - | . | gene_id "Fas2L";              |
| ref_parasitesGeneious | primer_bind_reverse | 1843 | 1863 | . | - | . | gene_id "Fas3L";              |
| ref_parasitesGeneious | primer_bind_reverse | 1950 | 1969 | . | - | . | gene_id "Entero2L";           |
| ref_parasitesGeneious | primer_bind_reverse | 2051 | 2072 | . | - | . | gene_id "Entero4L";           |



#### 4. Analyses script

##### **S4 File. aMPlexmpileup.sh**

#Before launching the script, the bam files from the Ion Torrent can be renamed with a more convenient name:

```
ls -l *.{bam,bai} | awk '{print $9}' > oldNames.txt
```

#Open the oldNames.txt in a text editor, (eventually in Excel) and type in a second column (or separated by a tab) the new names for each file, with a .bam or .bai (as appropriate) extension in the file name.

#Choose the name according to your objective, usually we use the sample name and replicate number.

# Create a text file with the two columns: RenameOldNew.txt Be careful to have Linux type Line Feed, in particular, change them if you have been using Excel

# Change both BAM and bai file names with the following command

```
cat RenameOldNew.txt | while read old new; do mv $old $new; done
```

# When copying the script, the fasta and the gff files from this Word document, it is essential to use the Linux way of handling the newline instruction (use either NotePad++ or the dos2unix command)

#Save the script starting from the following line and name it as aMPlexmpileup.sh

```
#! /bin/bash
```

# Script to analyze amplicons from the aMPlex Torrent workflow

# It uses as input files the BAM files resulting from the mapping to the reference sequence with the Ion Torrent Mapping Alignment Program (TMAP). It is necessary to use a fasta file with the same name in the first line as that used for mapping.

# It requires in the working directory fasta and gff files from the reference sequence, with each amplicon being named using the attribute misc\_feature. It also requires the software featureCounts, samtools, bcftools, and VarScan.

# A symbolic link to the VarScan.v2.3.7.jar should be in the same folder.

# Modify as desired within the script the names of the fasta and gff files (highlighted).

# Run the script as follows to keep a log file (here Report\_aMPlex\_script.txt) with standard error and standard output together: sh aMPlexmpileup.sh >>Report\_aMPlex\_script.txt 2>&1

# Create a symbolic link to the VarScan jar file using the proper address where you stored it (here ~/Software/VarScan.v2.3.7/VarScan.v2.3.7.jar)

```
ln -s ~/Software/VarScan.v2.3.7/VarScan.v2.3.7.jar ./VarScan.v2.3.7.jar
```

# Convert BAM to SAM

```
for file in *.bam
```

```
do
```

```
echo $file
```

```
samtools view -h $file > $file".sam"
```

```
done
```

# Clean extension tags

```
for file in *.bam.sam
```

```
do
```

```
mv "$file" "${file%.bam.sam}.sam"
```

```
done
```

# Determine the number of reads per amplicon

```
featureCounts -a ref_parasites.gff -t misc_feature -R -o CountAmplicons.count *.sam
```

# Determine the number of reads that includes the primers (to assess primer dimers (by subtracting the number of Amplicon reads) and other artefacts)

```
featureCounts -a ref_parasites.gff -t primer_bind -R -o CountUpperPrimers.count *.sam
```

```
featureCounts -a ref_parasites.gff -t primer_bind_reverse -R -o CountLowerPrimers.count *.sam
```

```

# Identify variants. These lines identify the variants with each sample analyzed in a sequencing run in a
different file.
# Mpileup generates a pileup of read bases using the alignments to the reference sequence.
# Varscan detects variation based on the reference sequence and produces a table with the percentage of
reads with each SNP.
# To permit species identification from the varscan files, discriminative SNP in the reference sequence
should be indicated using the degeneracy IUPAC code (e.g., Y, R, W, ...).

for file in *.bam
do
samtools mpileup -f ref_parasites.fasta $file | java -jar VarScan.v2.3.7.jar mpileup2snp >$file.varscan
done

# Clean extension tags
for file in *.bam.varscan
do
mv "$file" "${file%.bam.varscan}.varscan"
done

# Produce consensus sequences in the fastq format, assuming that the vcfutils.pl script is located in the
following path: /usr/share/samtools/vcfutils.pl (or modify script accordingly)
# Because degeneracy in the reference decreases the accuracy of the consensus sequences obtained, a
sequence without degeneracy is provided with a different file name (here ref_parasites2.fasta) but with
the same name in the first line of the fasta file.

for file in *.bam
do
#use this command if you have installed version 1.x (at least up to 1.2) of samtools and bcftools
samtools mpileup -uf ref_parasites2.fasta $file | bcftools call -c | vcfutils.pl vcf2fq > $file.fq
#If you have an older version of samtools installed (0.1.19 and earlier), you should use this version
instead (uncomment it, and comment the previous line)
#samtools mpileup -uRf ref_parasites2.fasta $file | bcftools view -cg - | /usr/share/samtools/vcfutils.pl
vcf2fq > $file.fq
done

# Clean up extension tags
for file in *.bam.fq
do
mv "$file" "${file%.bam.fq}.fq"
done

# Clean up files
mkdir samfile
mkdir countread
mkdir Varscan
mkdir Consensus
mkdir featureCount
mkdir BAMs
mv *.sam samfile
mv *.count countread
mv *.summary countread
mv *.varscan Varscan
mv *.fq Consensus
mv *.featureCounts featureCount

```

```
mv *.bam BAMs
mv *.bai BAMs

# Convert the consensus fastq files in the Consensus folder in fasta

# Recover the sequence from the fastq file (single sequence file)
cd Consensus
for file in *.fq
do
sed -r '\^+/q' $file | sed -r 's/^+//g' | sed -r '@/d' > $file.seq
done

# Clean extension tags
for file in *.fq.seq
do
mv "$file" "${file%.fq.seq}.seq"
done

# Create a fasta file by using the name of the file as the name of the sequence
for file in *.seq
do
echo \>$file | sed 's/.seq//' >tempfile
cat $file >>tempfile
mv tempfile $file.fa
done

# Clean extension tags
for file in *.seq.fa
do
mv "$file" "${file%.seq.fa}.fa"
done

# Final clean up
rm *.seq
mkdir Fasta
mv *.fa Fasta
```

| Genus                   | species               | Diagnostic SNP                                                          |
|-------------------------|-----------------------|-------------------------------------------------------------------------|
| <i>Taenia</i>           | <i>solium</i>         | 74:A, 80:C, 85:T, 86:G, 207:G, 220:G, 229:T, 236:A, 241:A, 250:G, 259:A |
|                         | <i>saginata</i>       | 74:G, 80:T, 85:A, 86:T, 207:A, 220:A, 229:A, 236:G, 241:G, 250:A, 259:T |
|                         | <i>asiatica</i>       | 74:A, 80:T, 85:A, 86:T, 207:A, 220:A, 229:A, 236:G, 241:G, 250:A, 259:T |
| <i>Echinococcus</i>     | <i>granulosus</i>     | 562:A,C,T                                                               |
|                         | <i>multilocularis</i> | 562:G                                                                   |
| <i>Diphyllobothrium</i> | <i>latum</i>          | 671:G, 781:T, 784:T, 787: A, 793: A                                     |
|                         | <i>dendriticum</i>    | 671:A, 781:C, 784:C, 787: G, 793: T                                     |
|                         | <i>nihonkaiense</i>   | 671:A, 781:T, 784:C, 787: A, 793: T                                     |
| <i>Dicrocoelium</i>     | <i>dendriticum</i>    | 1578:G                                                                  |
|                         | <i>chinensis</i>      | 1578:A                                                                  |
| <i>Fasciola</i>         | <i>hepatica</i>       | 1696:A, 1697:T, 1815:C                                                  |
|                         | <i>gigantica</i>      | 1696:G, 1697:C, 1815:T                                                  |

**S4 Table.** Location of the diagnostic SNPs for species discrimination to interpret the varscan data files when using the ref\_parasites fasta file for mapping the reads.

**S5 File. *Ascaris* and *Trichuris* sequences**

>Ascaris\_Asc4\_Most\_Ancient\_samples

GCGTATTGGYCCTAATAAGGTTAGTTTTATAGGTTTTTGCAGGCCATTTTTGATGGTGTAAACTTTTAAAGAA  
GGAGCAGATGACTCCTYTGAATTCTTCGG

>Ascaris\_Asc4\_Sample\_H

GCGTATTGGYCCTAATAAGGTTAGTTTTATAGGTTTTTGCAGGCTATTTTTGATGGTGTAAACTTTTGAAGAA  
GGAGCAGATGACTCCTYTGAATTCTTCGG

>Ascaris\_Asc4\_Sample\_Na

GCGTATTGGYCCTAATAAGGTTAGTTTTATGGGTTTTTGCAGGCTATTTTCGATGGTGTAAACTTTTGAAGAA  
GGAGCAGATGACTCCTYTGAATTCTTCGG

>Trichuris\_Trich3-4\_Major\_ancient\_European\_Sequence

TCATCCAAATGATTGATTATGACCTCGATGTTGAATCATTTGCACACATAGTTTGCAGAAGAATTTTATTCTCGT  
CTGTTTCGACGATAGACATTACGTGATTTGAGTTTAAACC

>Trichuris\_Trich3-4\_Minor\_ancient\_European\_Sequence\_v1

TCATCCAAATGATTGATTATGACCTCGATGTTGAATCATTTGTACACATAGTTTGCAGAAGAATTTTATTCTCGT  
CTGTTTCGACGATAGACATTACGTGATTTGAGTTTAAACC

>Trichuris\_Trich3-4\_Minor\_ancient\_European\_Sequence\_v2

TCATCCAAATGATTGATTATGACCTCGATGTTGAATCATTTGTACATATAGTTTGCAGAAGAATTTTATTCTCGT  
CTGTTTCGACGATAGACATTACGTGATTTGAGTTTAAACC
